# Supplementary material for: Activity-driven tissue alignment in proliferating spheroids
Source: Royal Society of Chemistry journal article supplement (doi:10.1039/d2sm01239a), 2022-12-24
Supplement: d2sm01239a4.pdf [file d2sm01239a4.pdf]

(a)

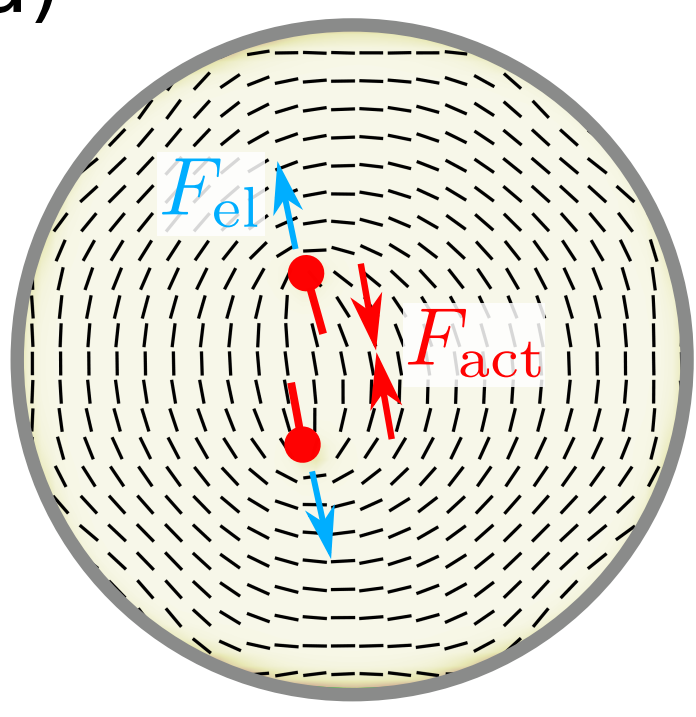

$\zeta = 0.005$

Stable +1 defect

$\Psi < 1$

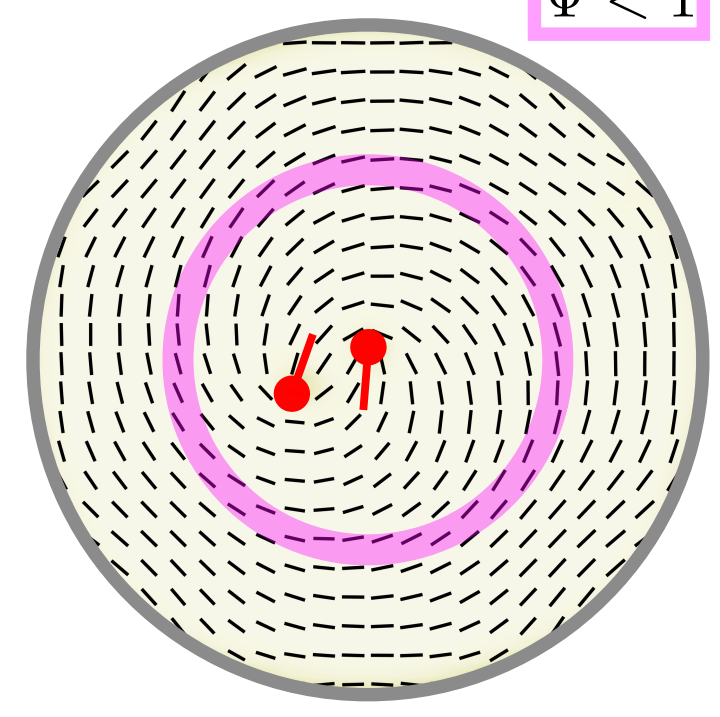

$\zeta = 0.01$

(b)

$\Psi > 1$

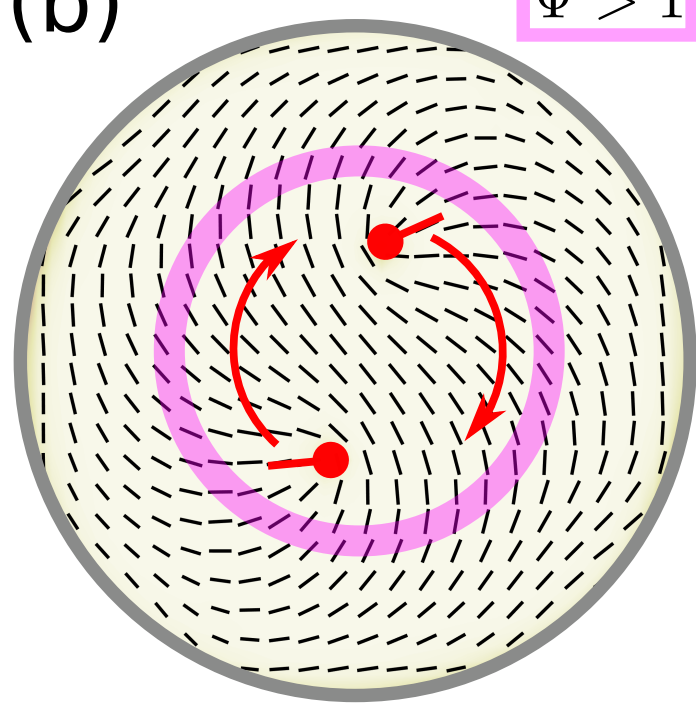

$\zeta = 0.015$

Disclination dance

(c)

$\Psi \approx 1$

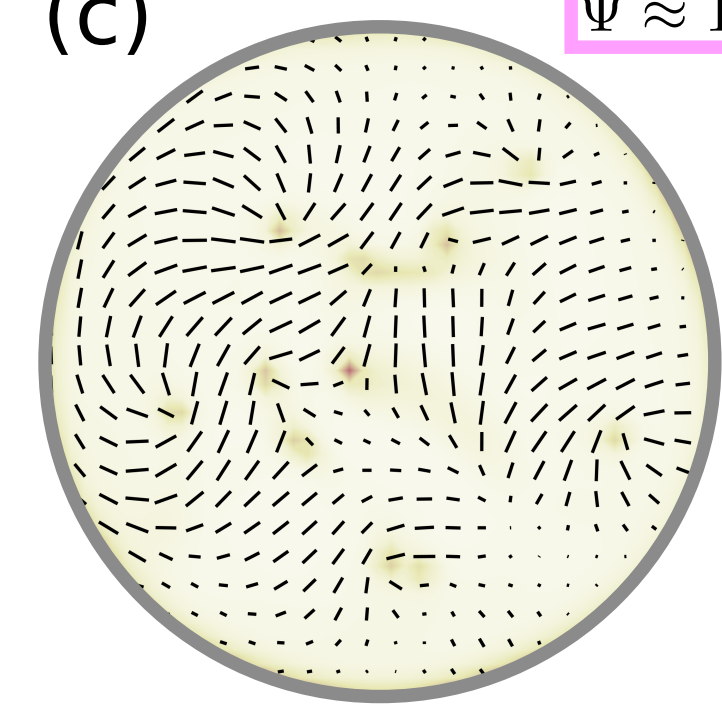

$\zeta = 0.05$

Active turbulence

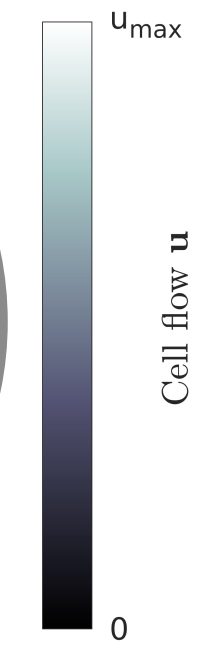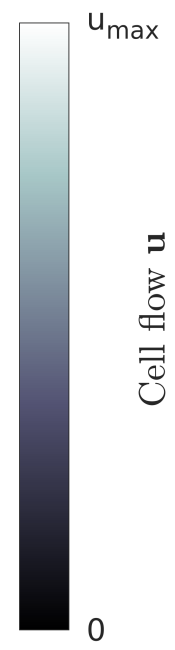

3D Disclination structure:

(d)

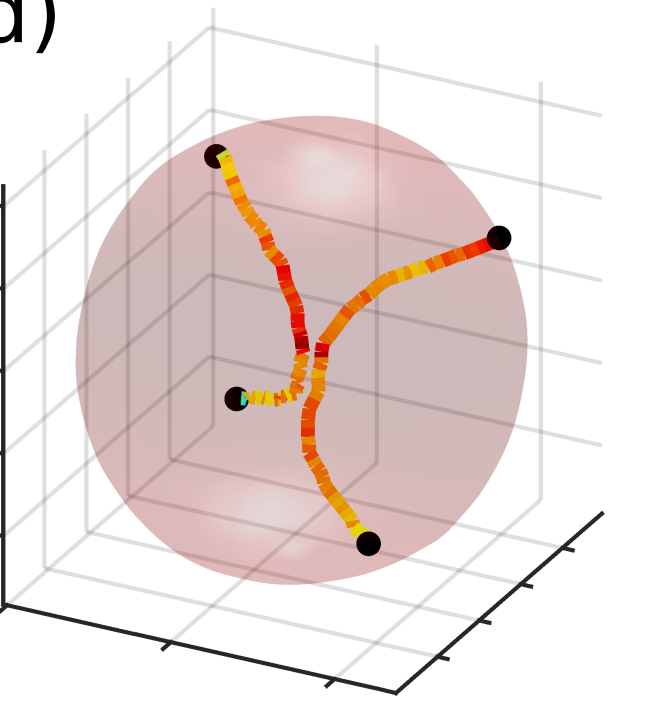

Stable +1 defect

(e)

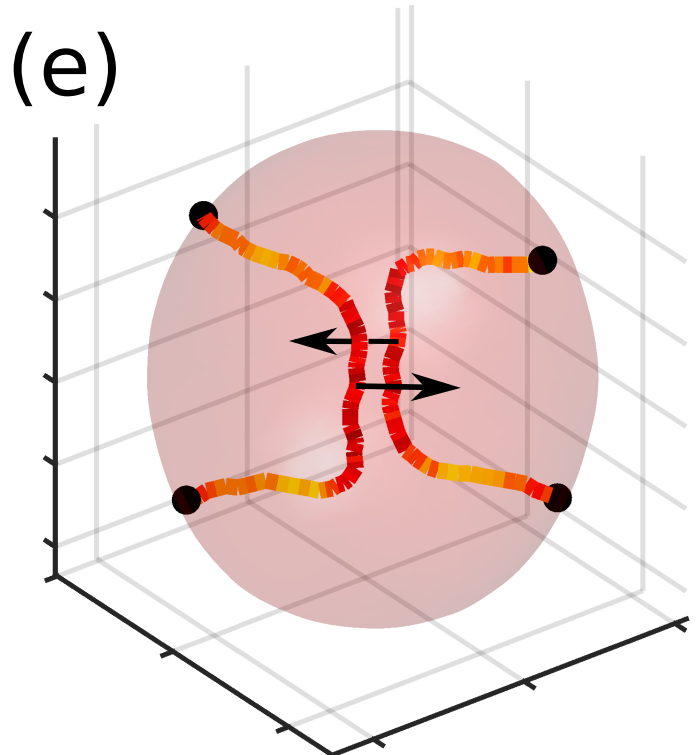

Time →

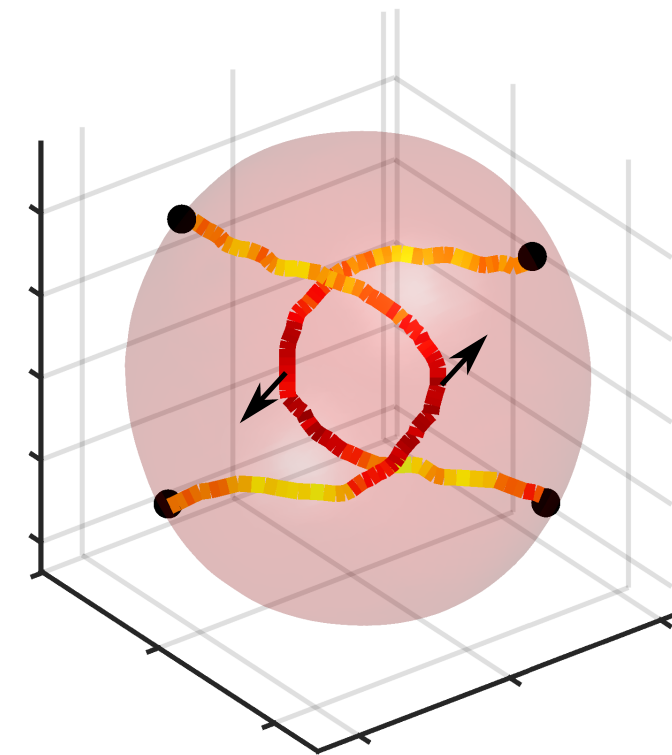

Disclination dance

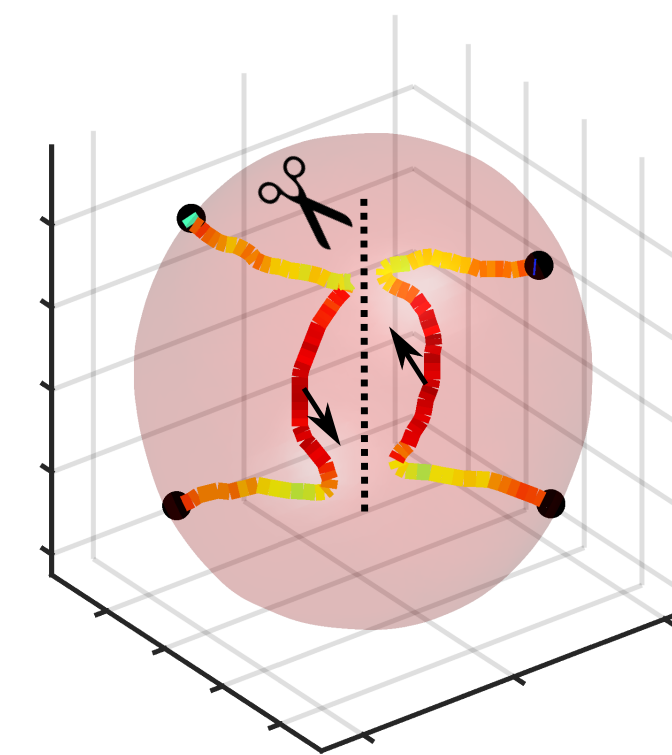

(f)

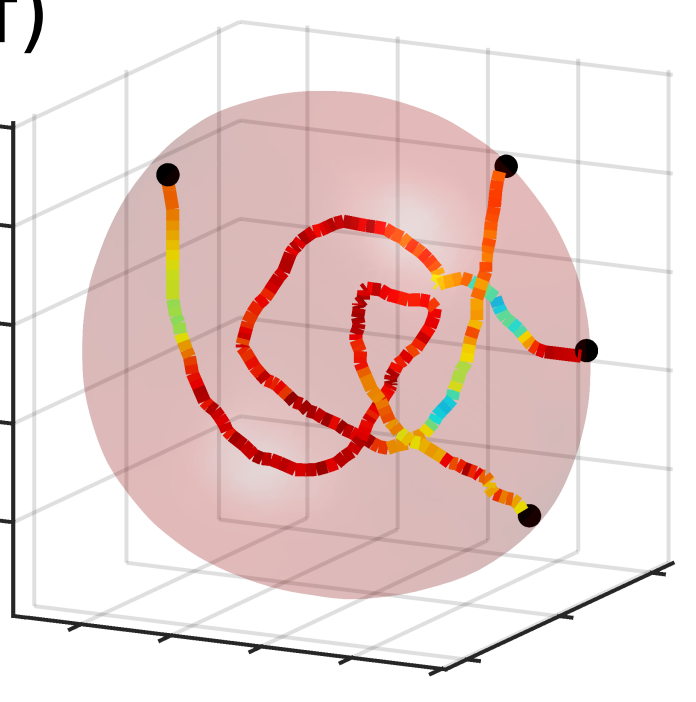

Active turbulence
