# Supplementary figures and images for: Activity-driven tissue alignment in proliferating spheroids
Source: Royal Society of Chemistry journal article supplement (doi:10.1039/d2sm01239a), 2022-12-24

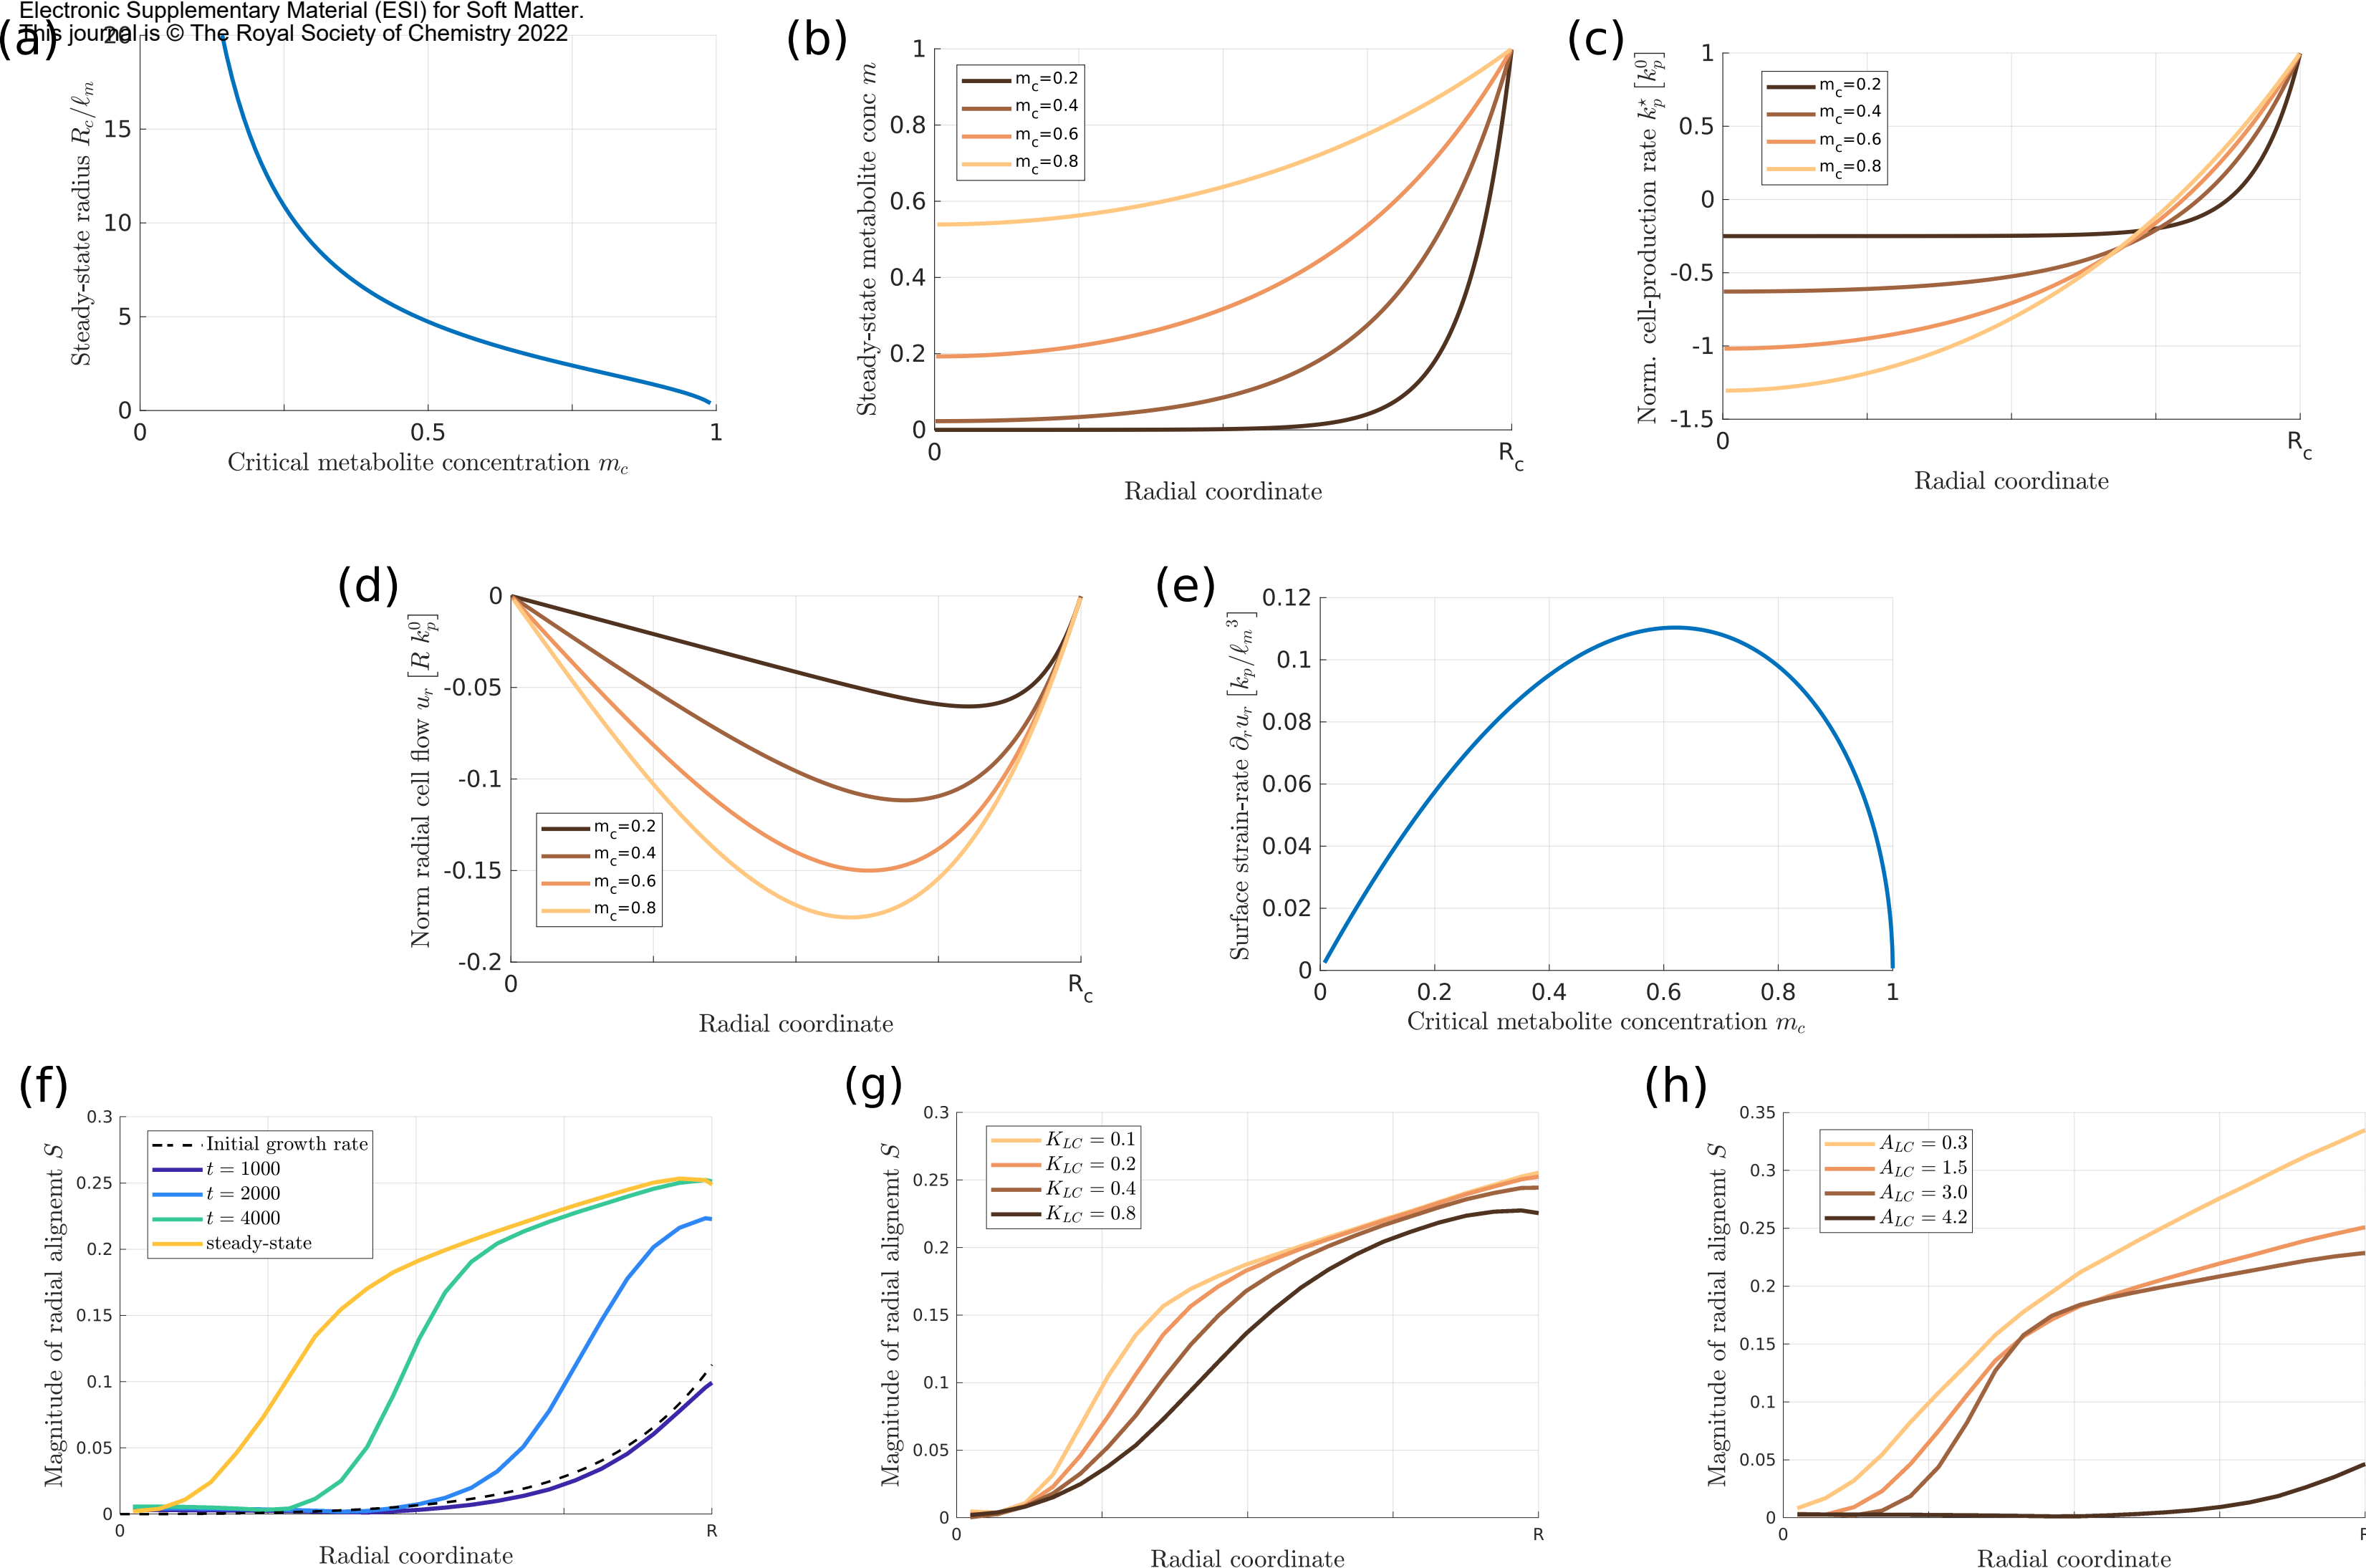

Supplement: d2sm01239a1.pdf [file d2sm01239a1.pdf]

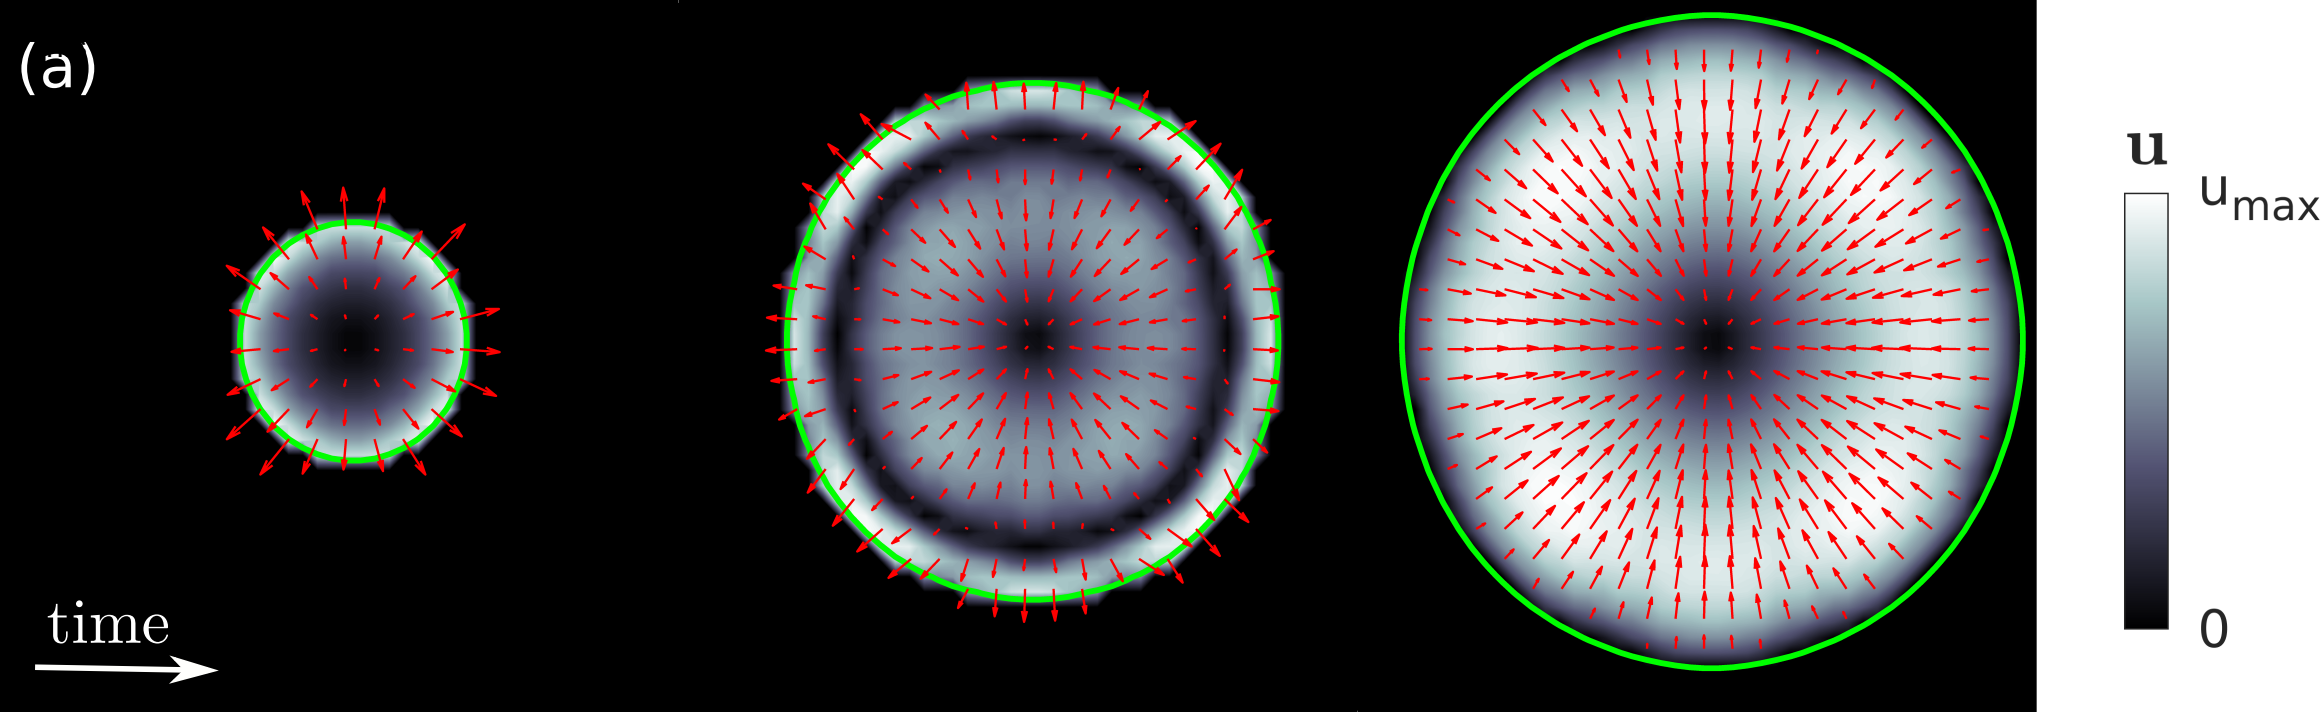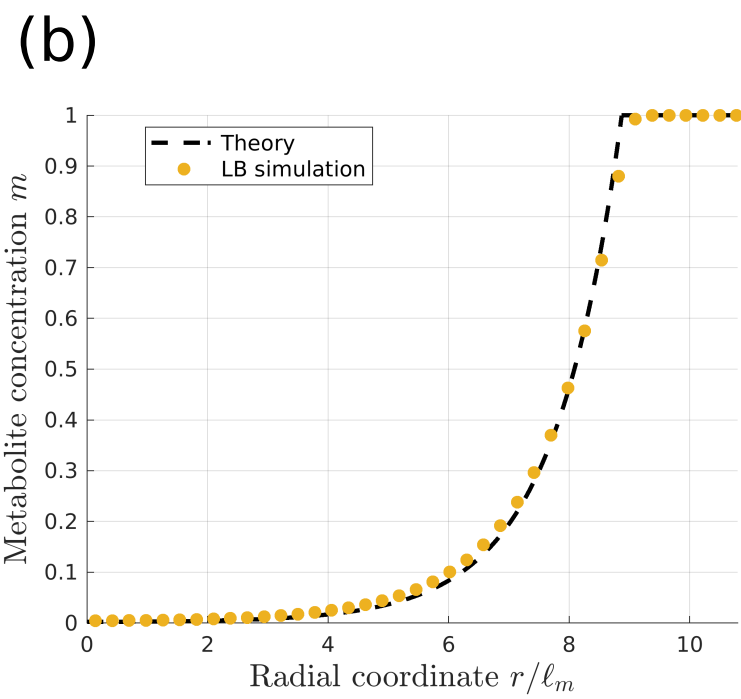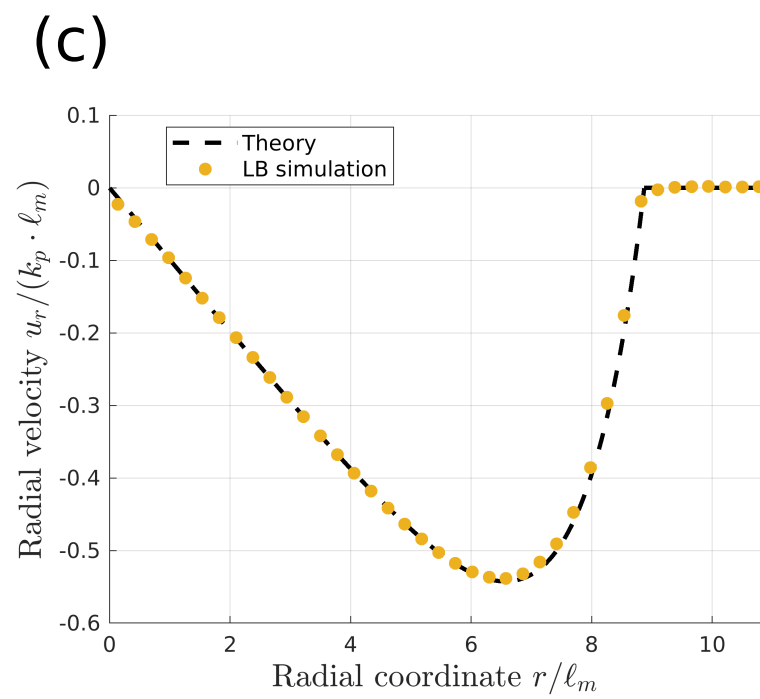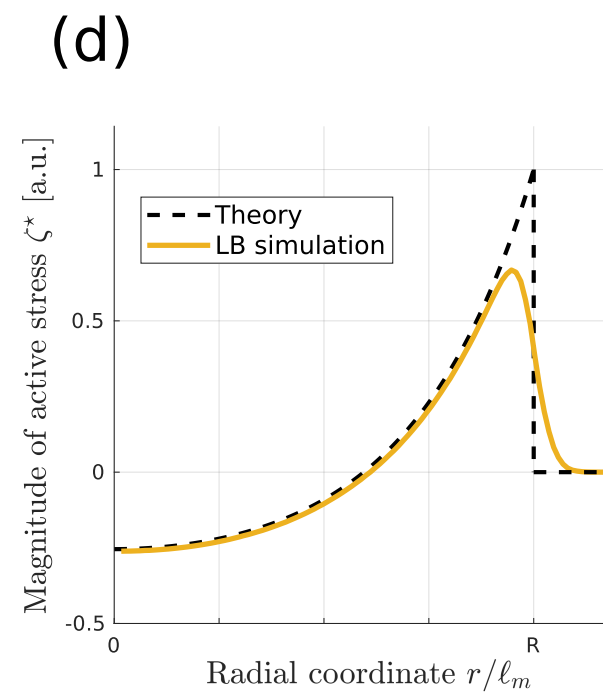

Supplement: d2sm01239a2.pdf [file d2sm01239a2.pdf]

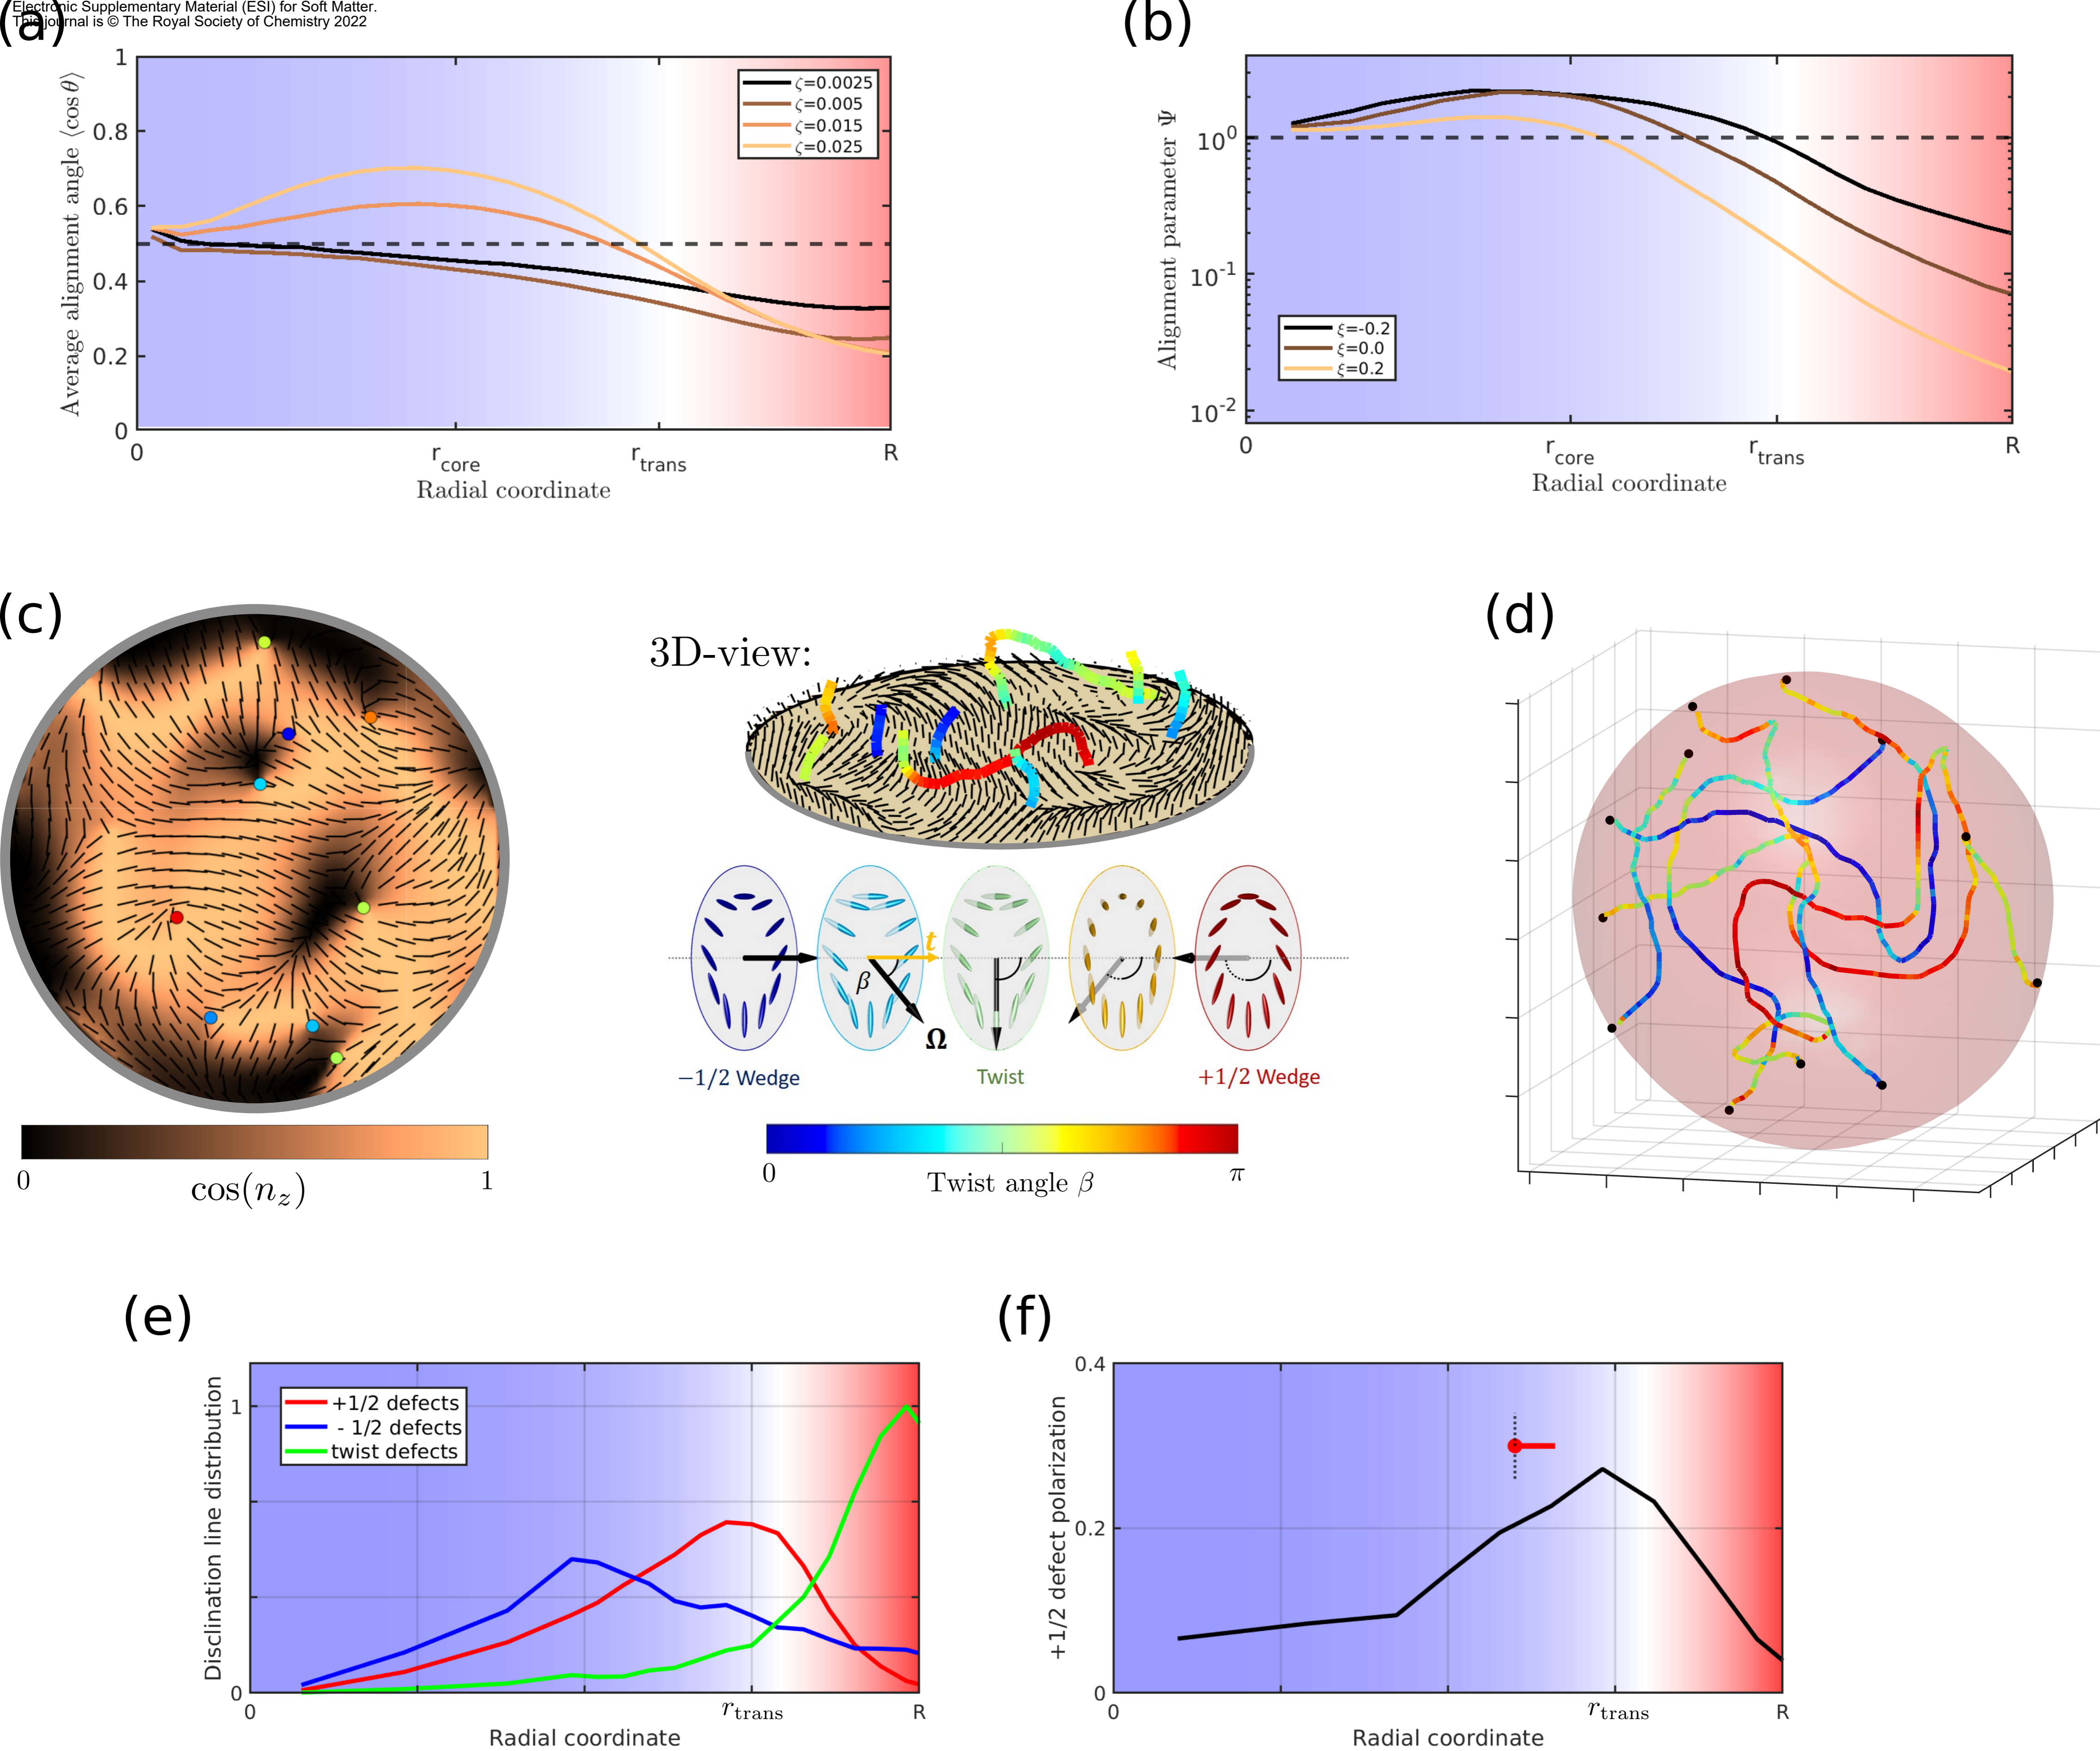

Supplement: d2sm01239a3.pdf [file d2sm01239a3.pdf]

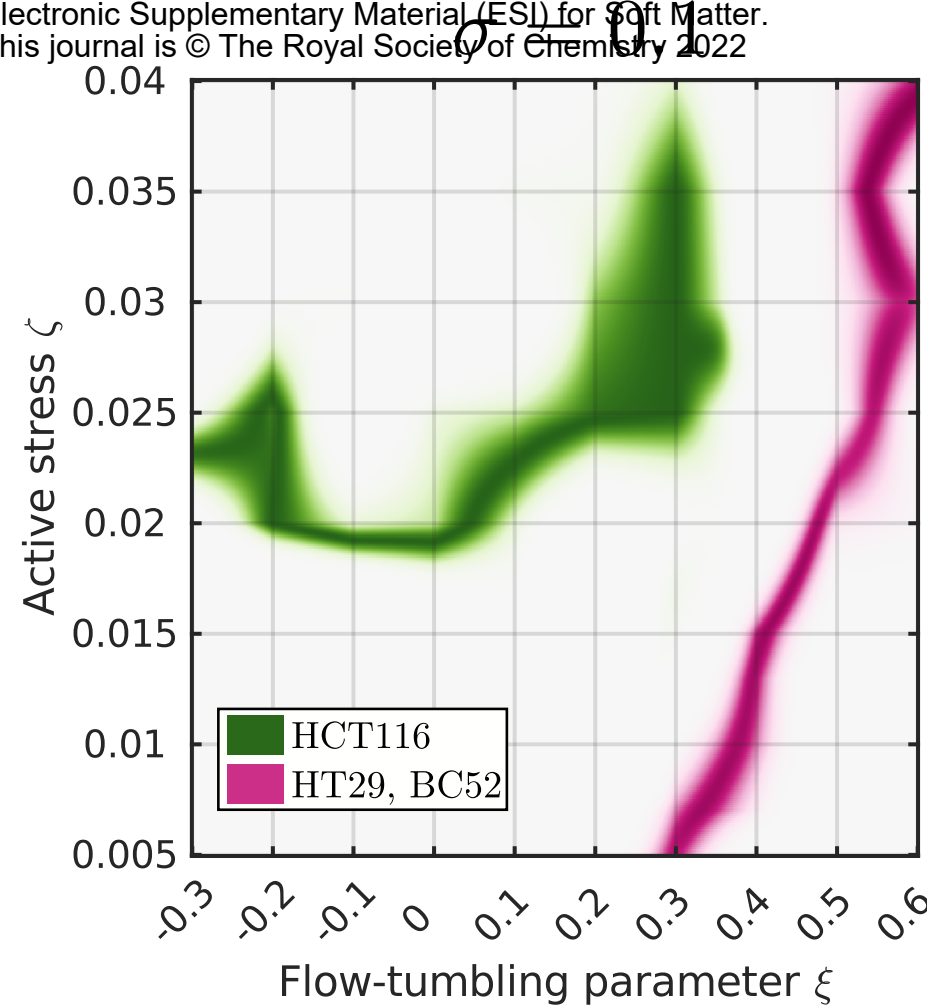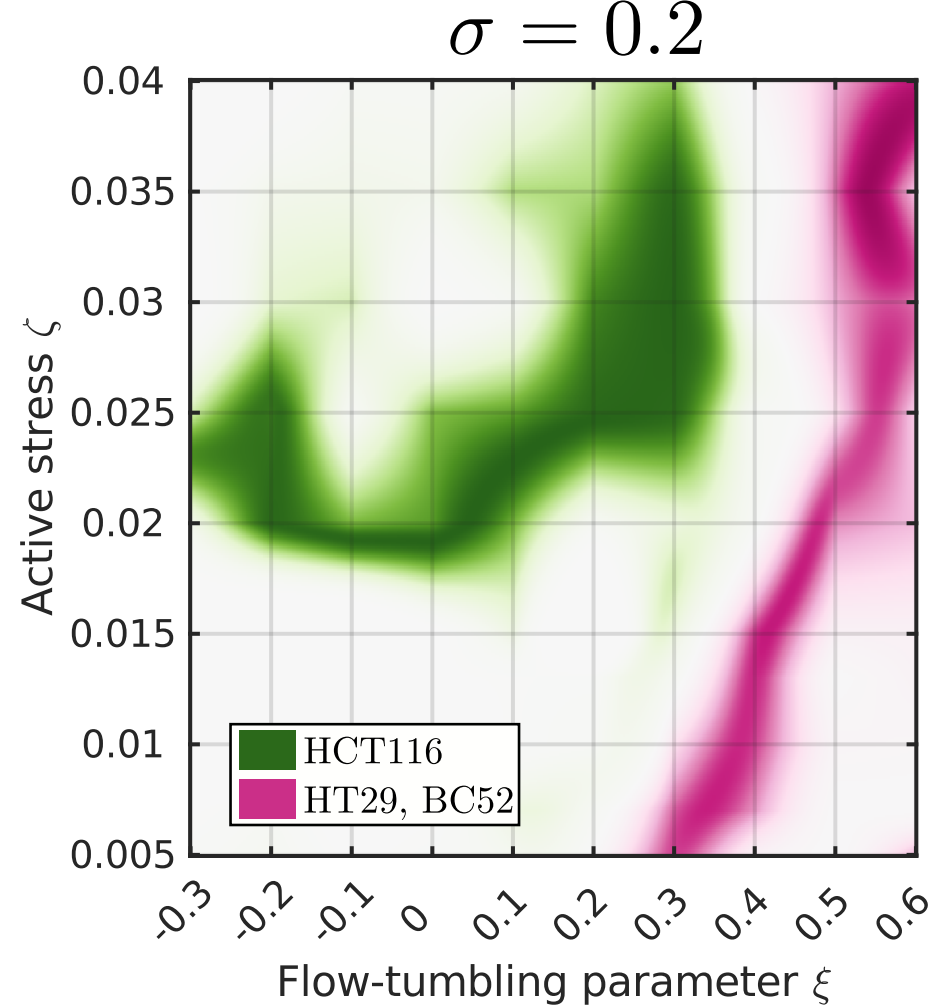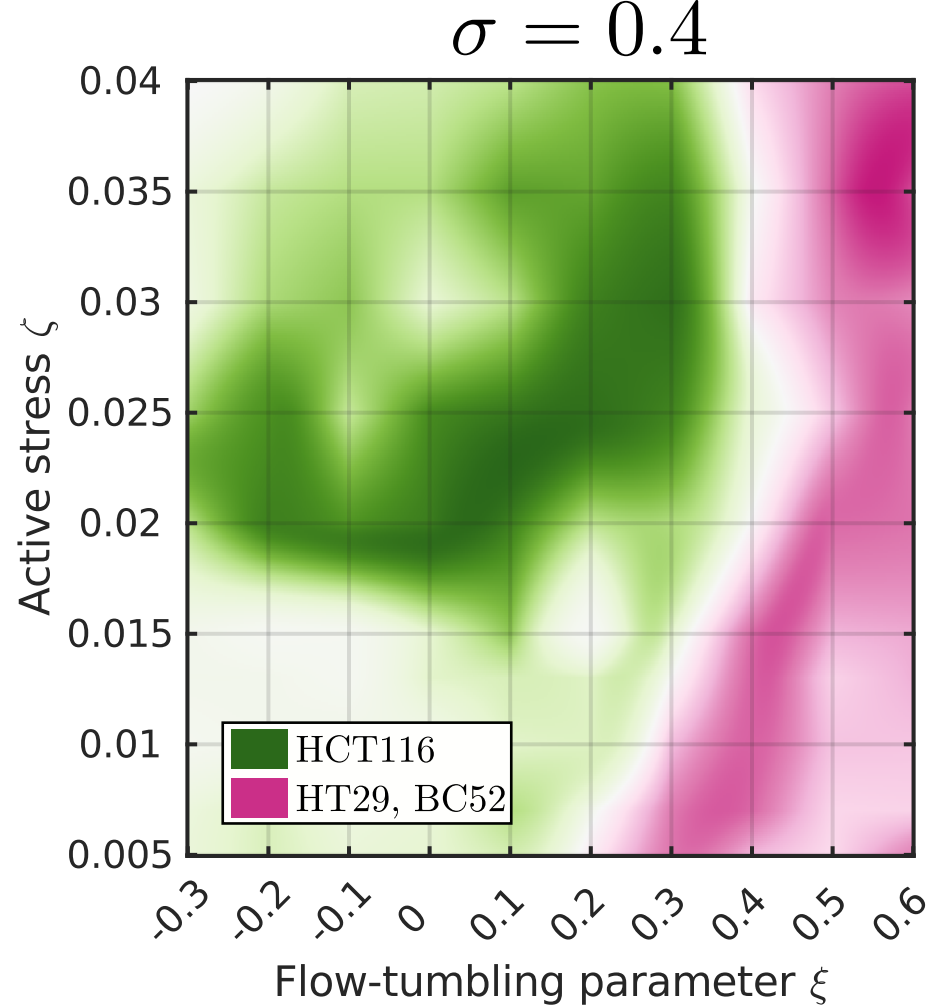

Supplement: d2sm01239a5.pdf [file d2sm01239a5.pdf]
